# Supplementary material
Source: Research Square preprint supplement (doi:10.21203/rs.3.rs-9480999/v1)
Supplement: Supplementary file 1 [file d6c466fcf4c55c09d583de5f.docx]

## Appendix

| **Supplementary Table 1: WHO guidance on the management of neonates based on the possible Signs of Bacterial Infections (pSBI) [14]** | | |
| --- | --- | --- |
| **WHO Classification** | **Characteristics** | **Antibiotic Recommendation** |
| Fast breathing (Respiratory rate ≥ 60 breaths/min) as the only sign of illness | 0-6 days old | Oral amoxicillin (50 mg/kg per dose, twice daily) for 7 days. |
| 7-59 days old | Oral amoxicillin (50 mg/kg per dose, twice daily) for 7 days. |
| Clinical Severe Infection: at least one sign of severe infection e.g. movement only when stimulated, not feeding well, fever (≥ 38°C) or hypothermia (< 35.5°C) and severe chest in-drawing) | 0-59 days old | IM Gentamicin (5–7.5 mg/kg once daily for 7 days) + Oral Amoxicillin (50 mg/kg per dose, twice daily for 7 days)  Alternative: IM Gentamicin (5–7.5 mg/kg once daily for 2 days) + Oral Amoxicillin (50 mg/kg per dose, twice daily for 7 days) |
| Critical Illness: Presence of any of the following signs: convulsions, unable to feed at all, no movement on stimulation, unable to cry, bulging fontanelle, cyanosis. | 0-59 days | IM Ampicillin (twice daily) + IM Gentamicin (5–7.5 mg/kg once daily)  Alternative: IM Ceftriaxone (once daily) ± IM Gentamicin (once daily)  Alternative: IM Benzyl Penicillin (twice daily) + IM Gentamicin (once daily)  Alternative: IM Procaine Penicillin (once daily) + IM Gentamicin (once daily) |
| Note: **(World Health Organization. (2015) “GUIDELINE: Managing possible serious bacterial infection in young infants when referral is not feasible.”)** | | |

| **Supplementary Table 2: Latent class analysis model performance metrics ([55, 56])** | | |
| --- | --- | --- |
|  | Metric | Definition |
| 1. | Bayesian Information Criterion (BIC) | The BIC rewards parsimony in models and can be used to compare competing LCA solutions. Lower BICs indicate better fit. |
| 2. | Vuong-Lo-Mendell-Rubin adjusted likelihood ratio test | Provides a p-value, which indicates if one model is statistically better than another (e.g. model with K classes is better than one with K-1 classes). |
| 3. | The average latent class posterior probability (ALCPP) | The average probability of the class model accurately predicting class membership for individuals. Probabilities between .80 and .90 are acceptable. |
| 4. | Entropy | It indicates how accurately the model defines classes. In general, an entropy value close to 1 is ideal [57] and above .8 is acceptable [58]. |
| 5. | Number of sample members in each class | There are no existing guidelines on determining class size. While consensus is that classes should not contain less than 5% of the sample [59], the important issue is whether the small class makes conceptual sense. |

| **Supplementary Table 3: Measures for model’s performance assessment (adapted from Riley et al [60]** |
| --- |
| 1. Calibration |
| This is how close the predicted mortality event is close to the observed mortality event. This measure has two key components: |
| (a) Calibration slope |
| The calibration slope measures the agreement between the observed and predicted risks of the event (outcome) across the whole range of predicted values. For a perfectly calibrated model, we expect to see that, in 100 individuals with a predicted risk of *r*% from our model, *r* of the 100 truly have the outcome of interest (i.e. death in this case). The slope should ideally be 1. A slope < 1 indicates that some predictions are too extreme (e.g. predictions close to 1 are too high, and predictions close to 0 are too low), and a slope > 1 indicates predictions are too narrow. A calibration slope < 1 is often observed in validation studies, consistent with over-fitting in the original model development |
| (b) Calibration-in-the-large (calibration intercept) |
| The calibration intercept compares the mean of all predicted risks with the mean observed risk, i.e. on average how close is predicted to observed in the whole dataset. This parameter hence indicates the extent that predictions are systematically too low or too high. It can be well assessed graphically, in a plot with predictions on the *x*-axis and the observed endpoint on the *y*-axis. The observed values on the *y*-axis are 0 or 1 (e.g. dead/alive), while the predictions on the *x*-axis range between 0 and 100% with the intercept representing calibration-in-the-large |
| 2. Discrimination |
| This is a measure of a prediction model’s separation between those with or without the outcome, usually represented by the c-statistic, which is also known as the concordance index or, for binary outcomes, the area under the receiver operating characteristic (AUROC) curve. It gives the probability that for any randomly selected pair of individuals, one who died and one who survived (outcome), the model assigns a higher probability to the individual who died (outcome). A value of 1 indicates the model has perfect discrimination, while a value of 0.5 indicates the model discriminates no better than chance |

**Supplementary Figure 1**: pSBI signs and symptoms present in the different datasets

**Supplementary Figure 2**: Patterns of pSBI signs and symptoms missingness in the different datasets

**Supplementary Figure 3:** Common admission diagnoses for neonates managed for sepsis (n=8012), excluding sepsis diagnosis

**Supplementary Figure 4** Feature importance for determining cluster membership, derived from use of extreme gradient boosted regression trees (xgboost)
